# Supplementary material
Source: PubMed Central journal article supplement (PMC5947819)

Figure 2

a

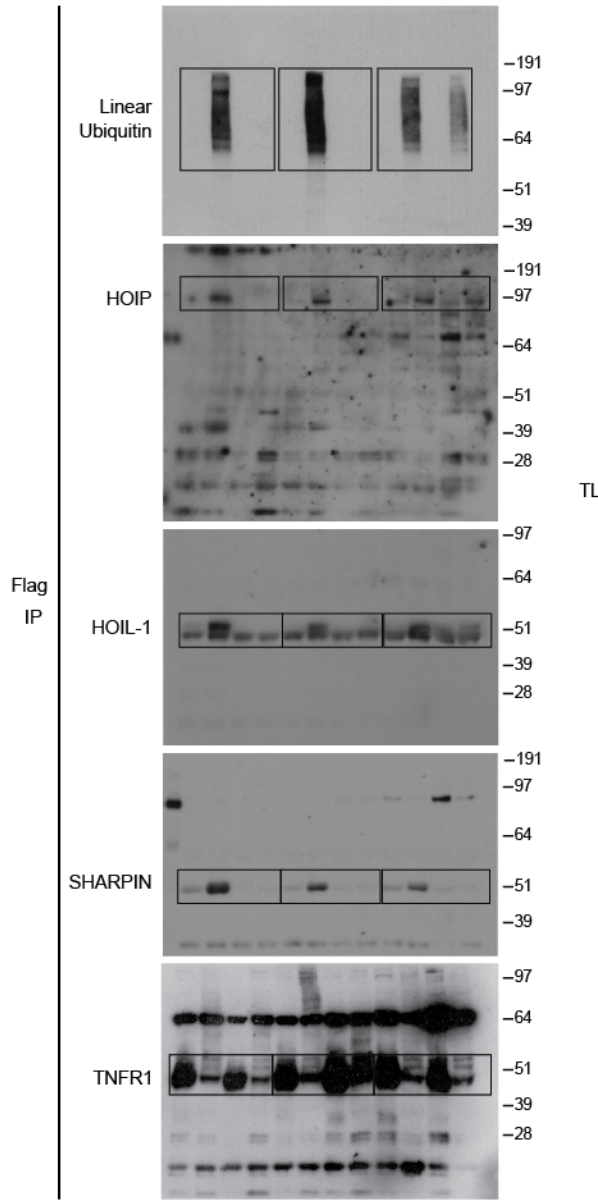

TL

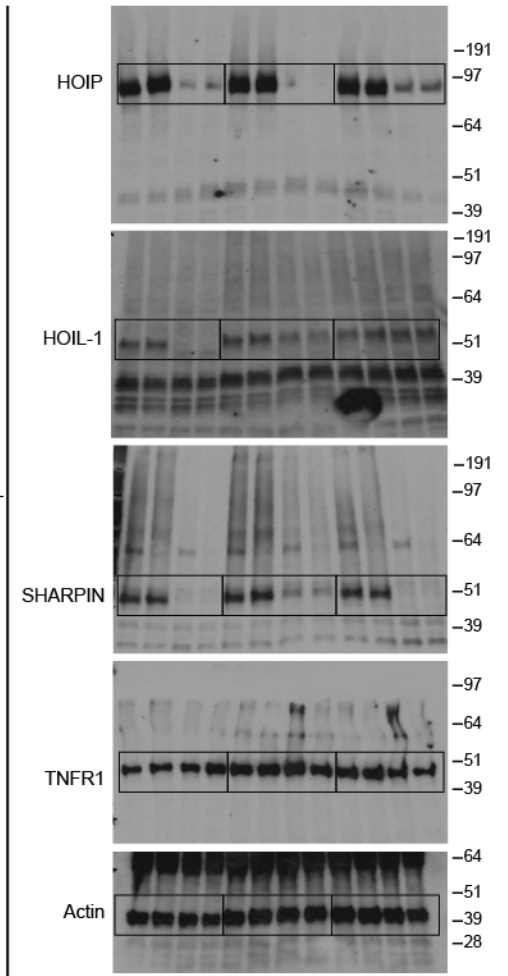

b

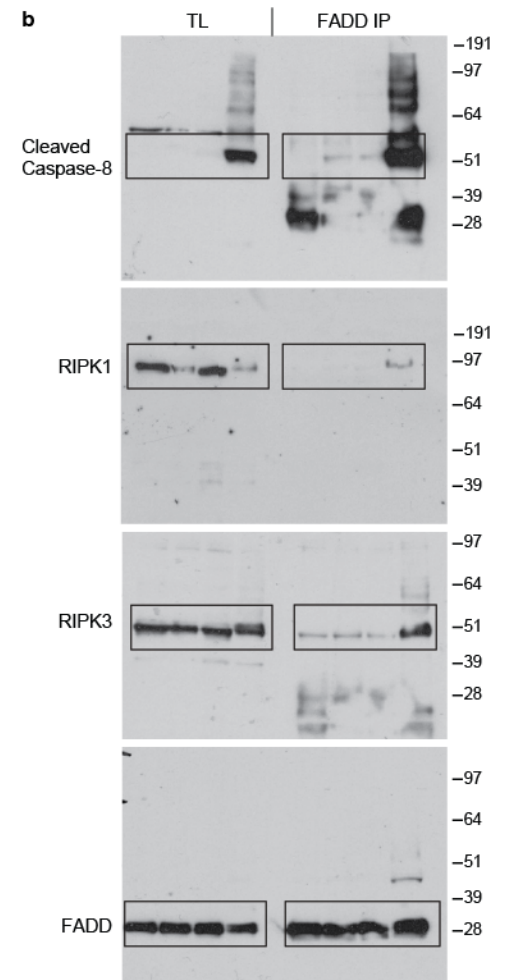

**Figure 2****d**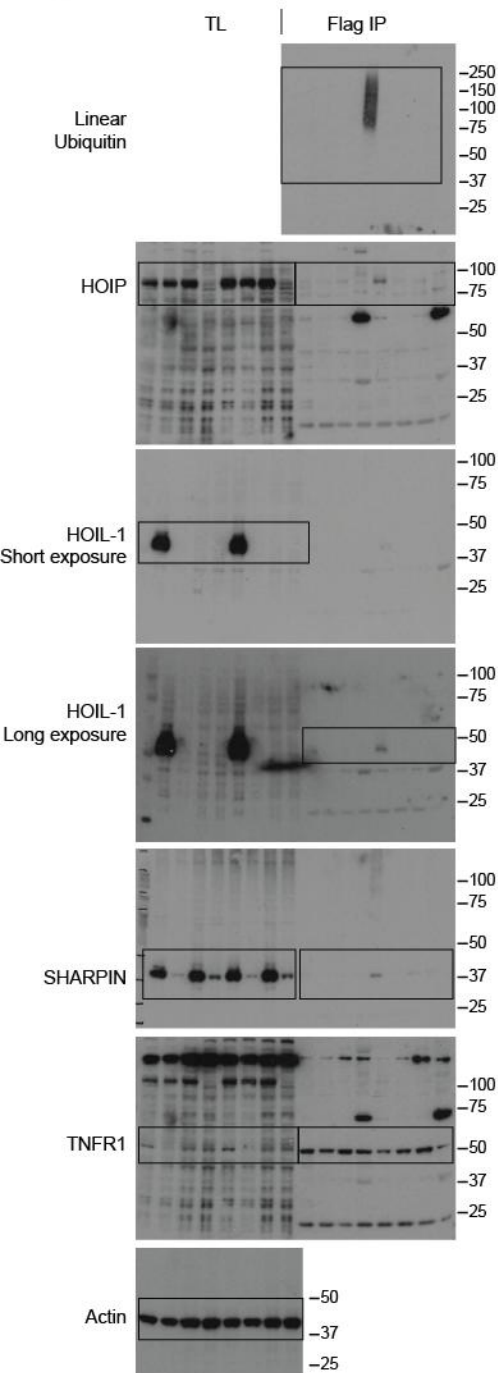**e**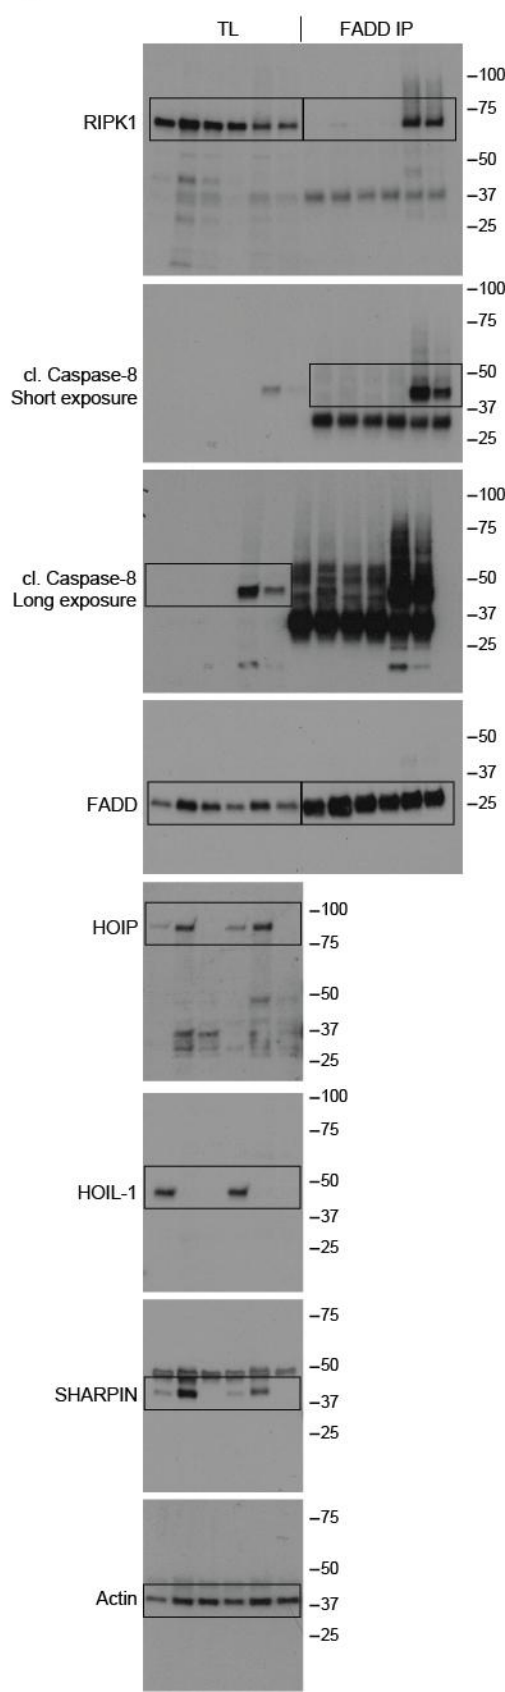

**Figure 2**

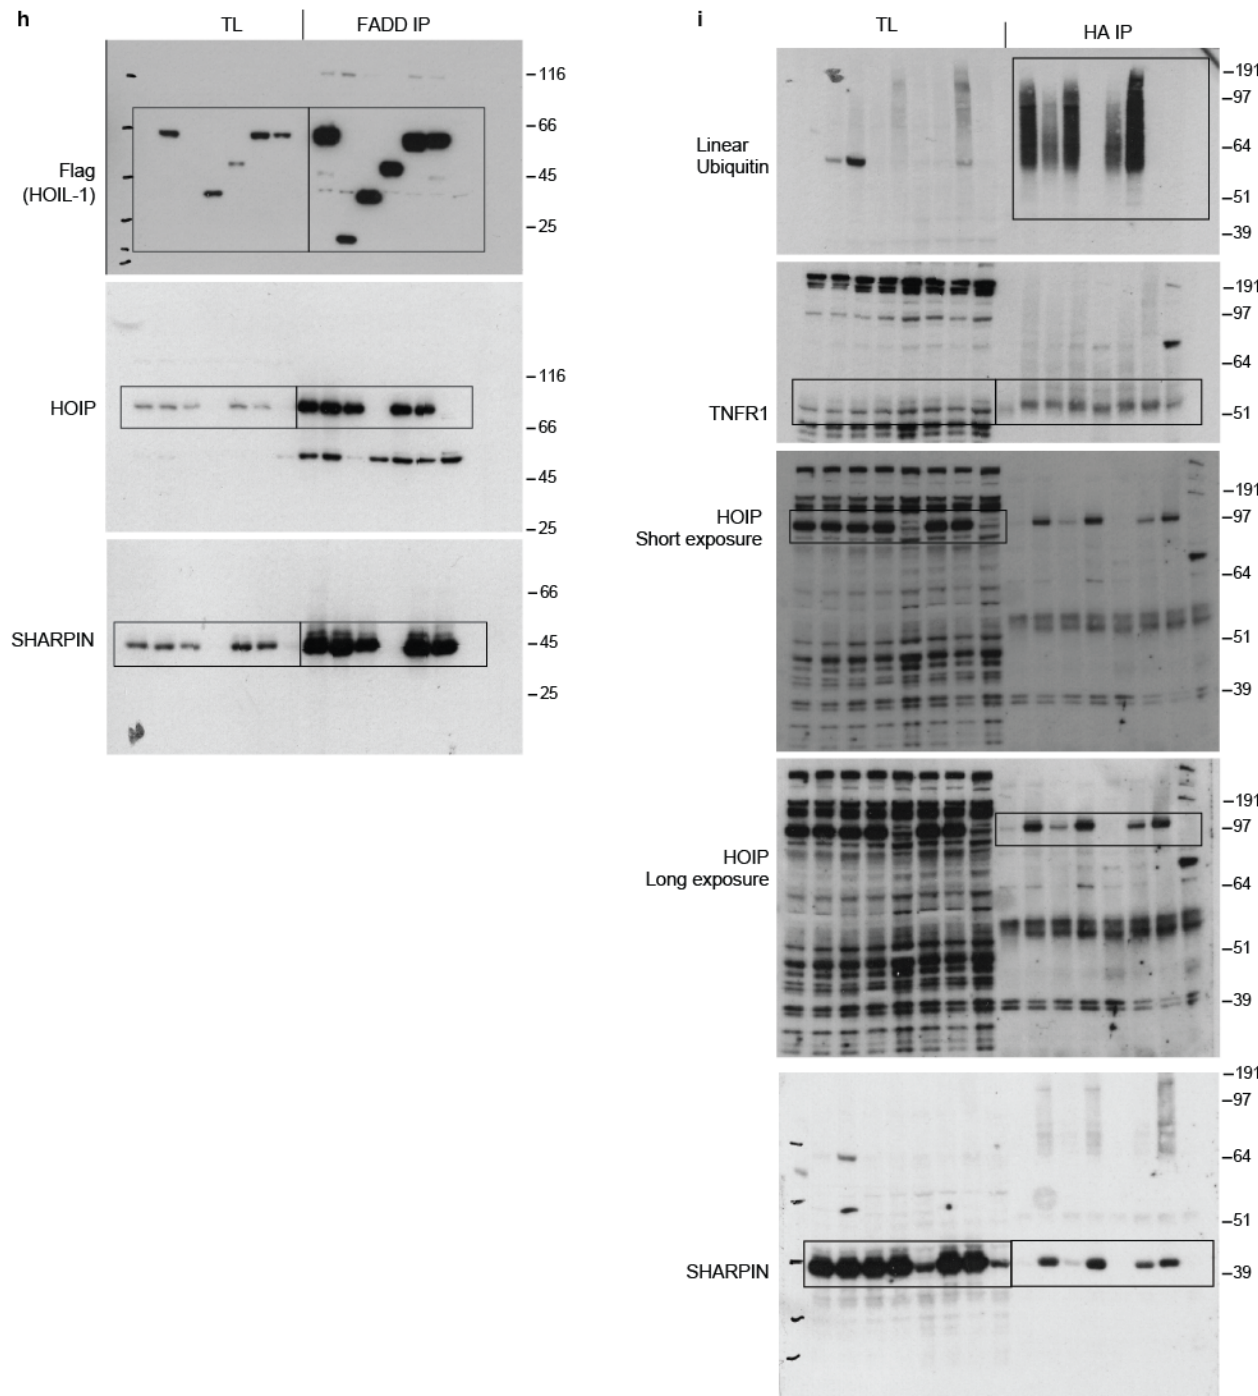

Figure 3

c

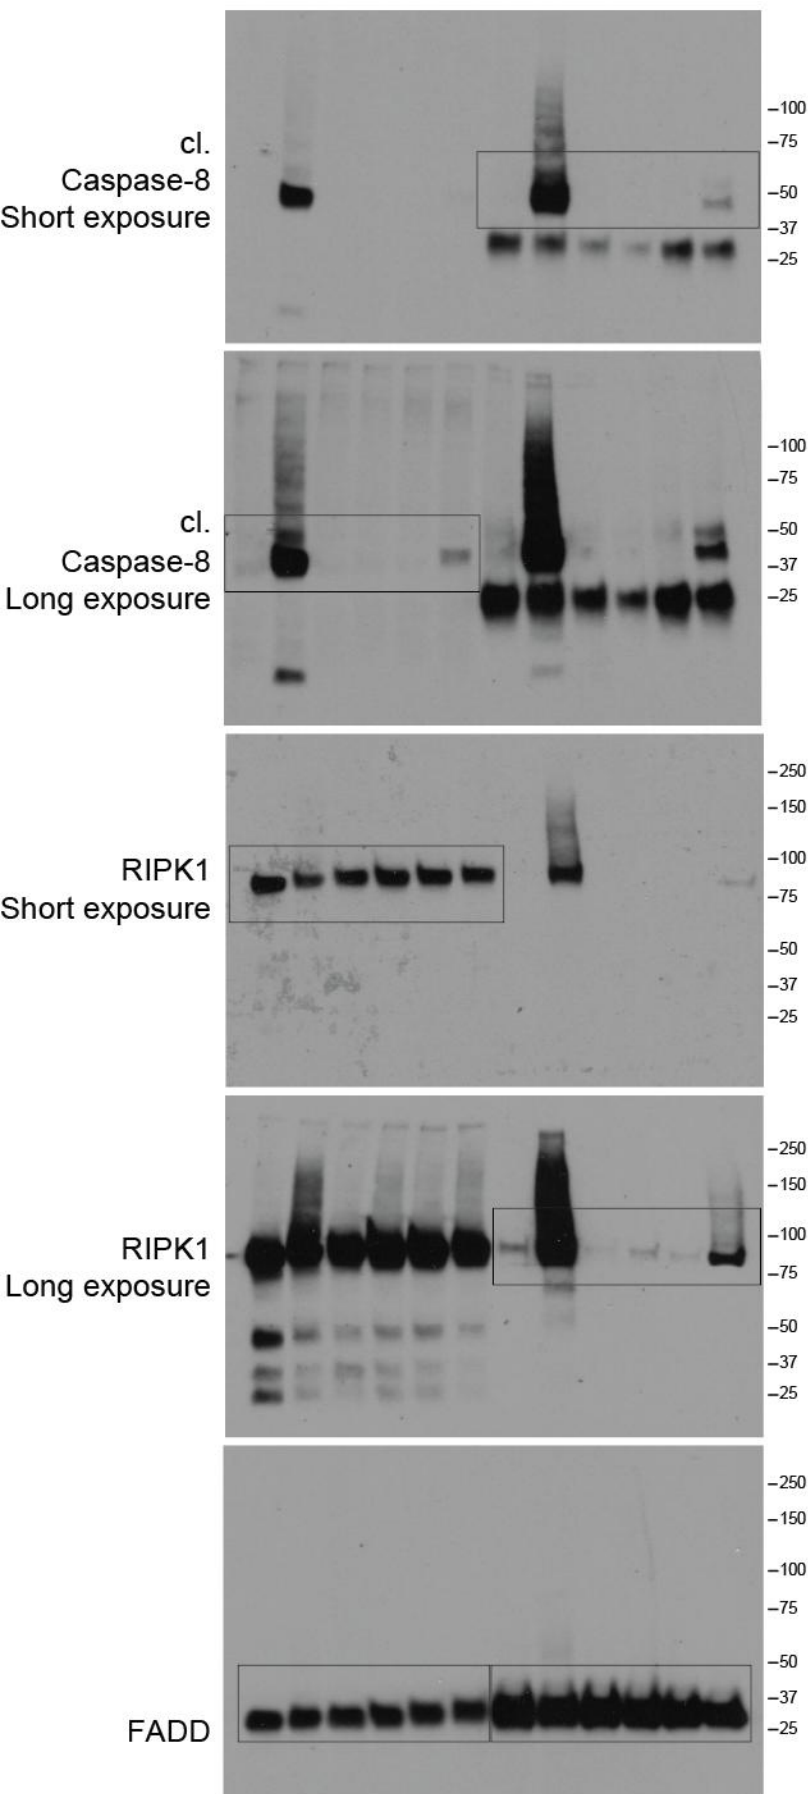

Extended data figure 1

c

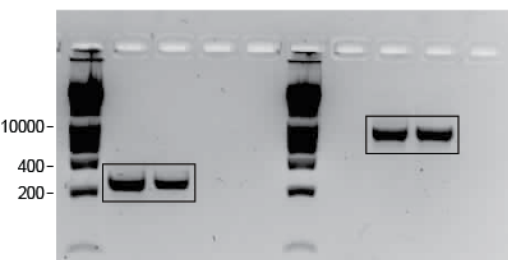

b Full gels in original figure

Extended data figure 5

a

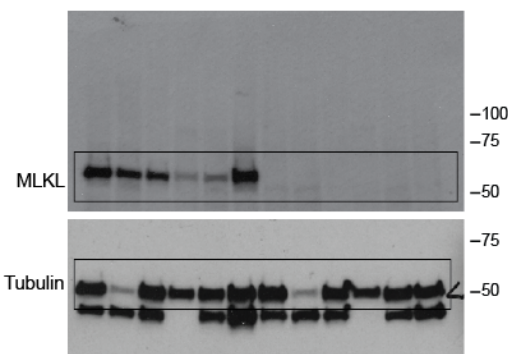

d

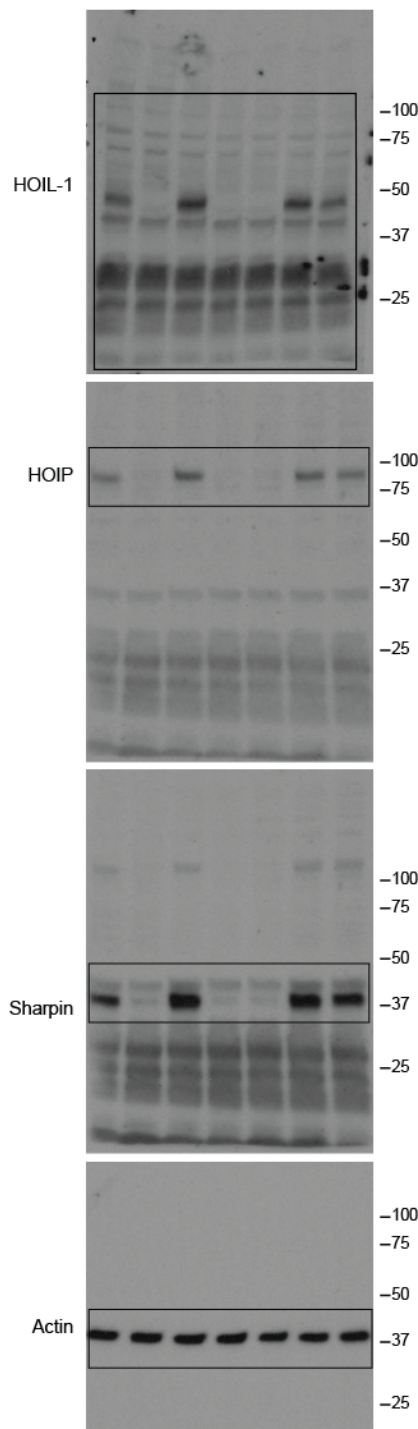

**a**

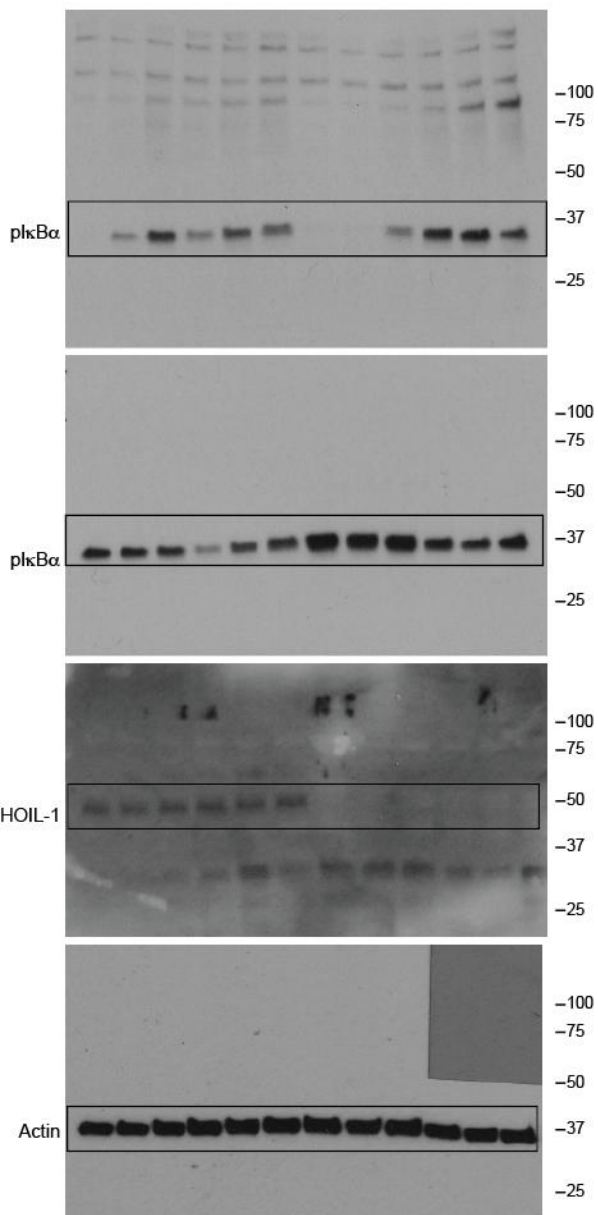

**b**

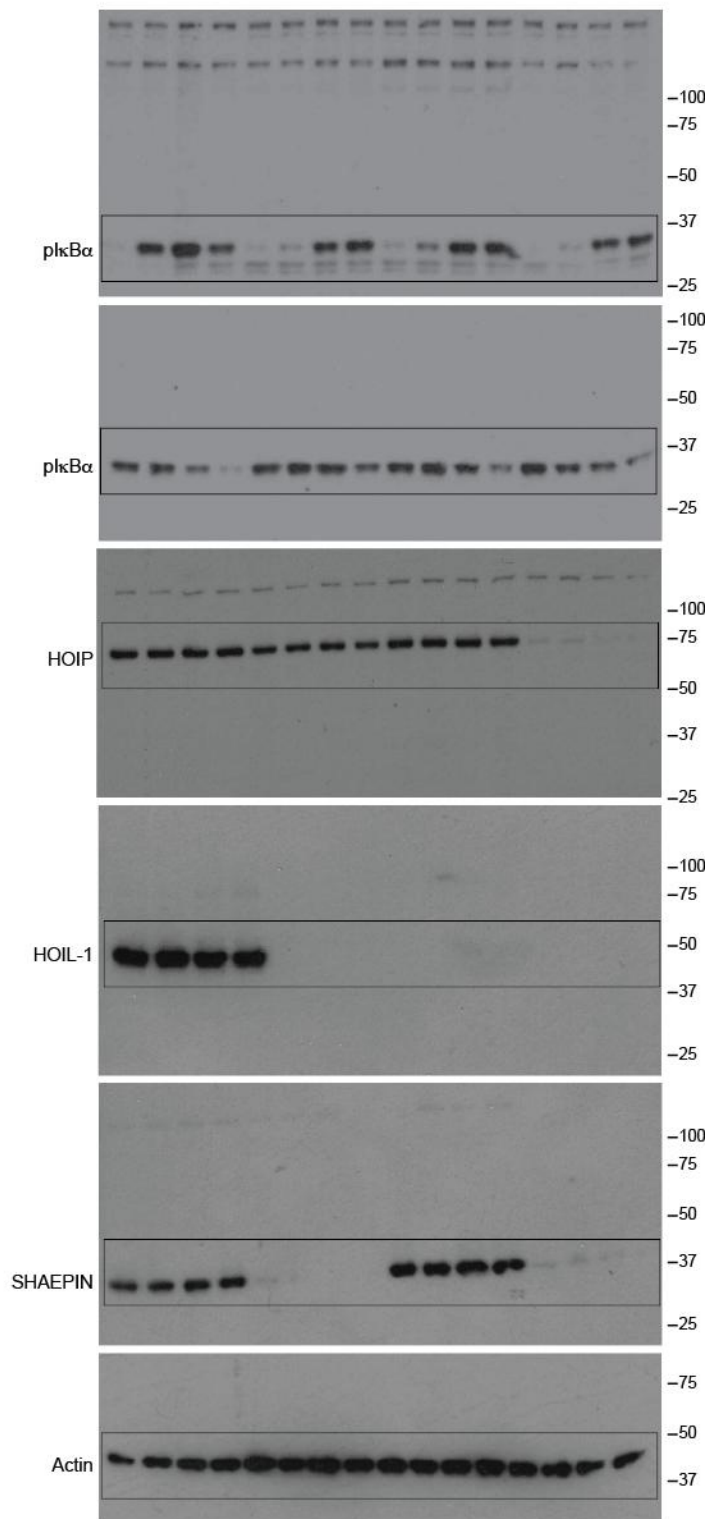

Extended data figure 3

**c**

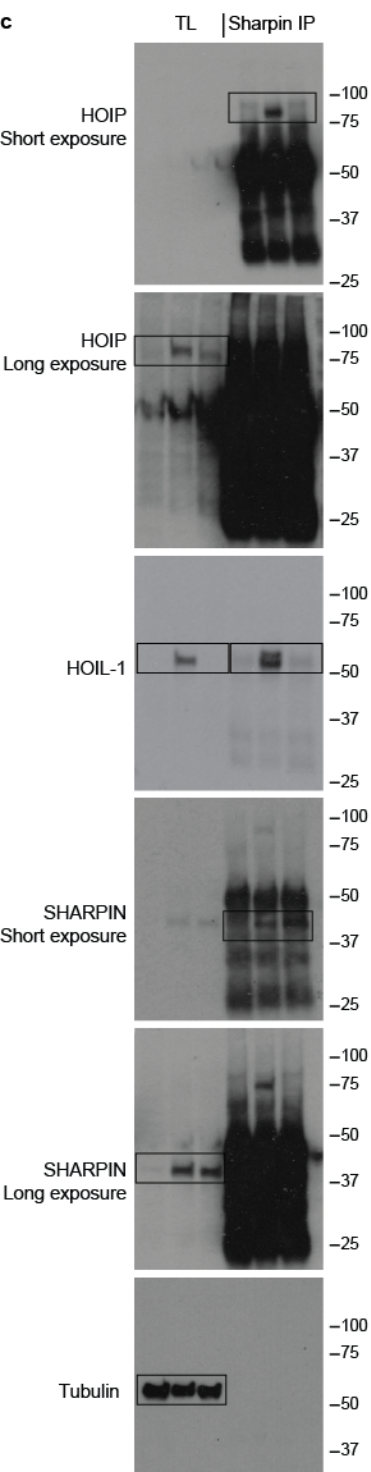

**d**

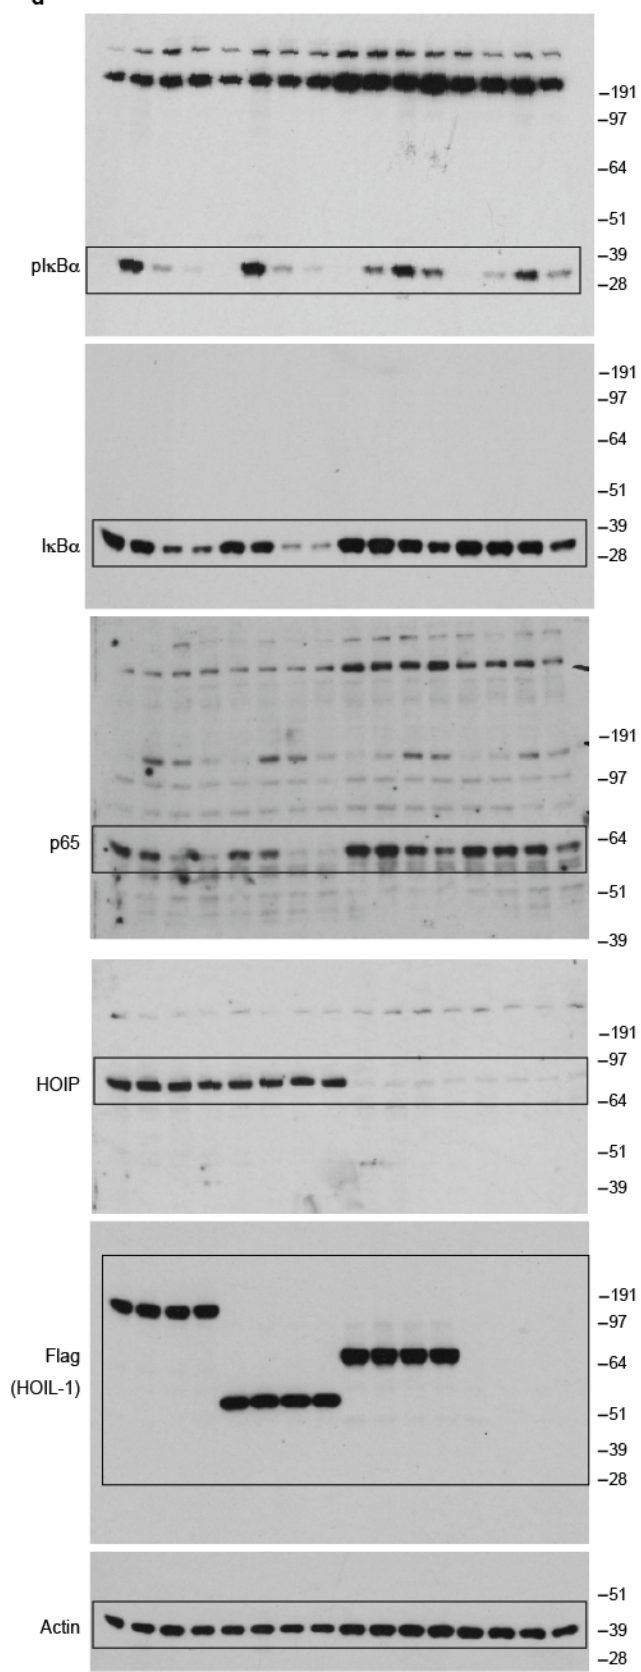

h

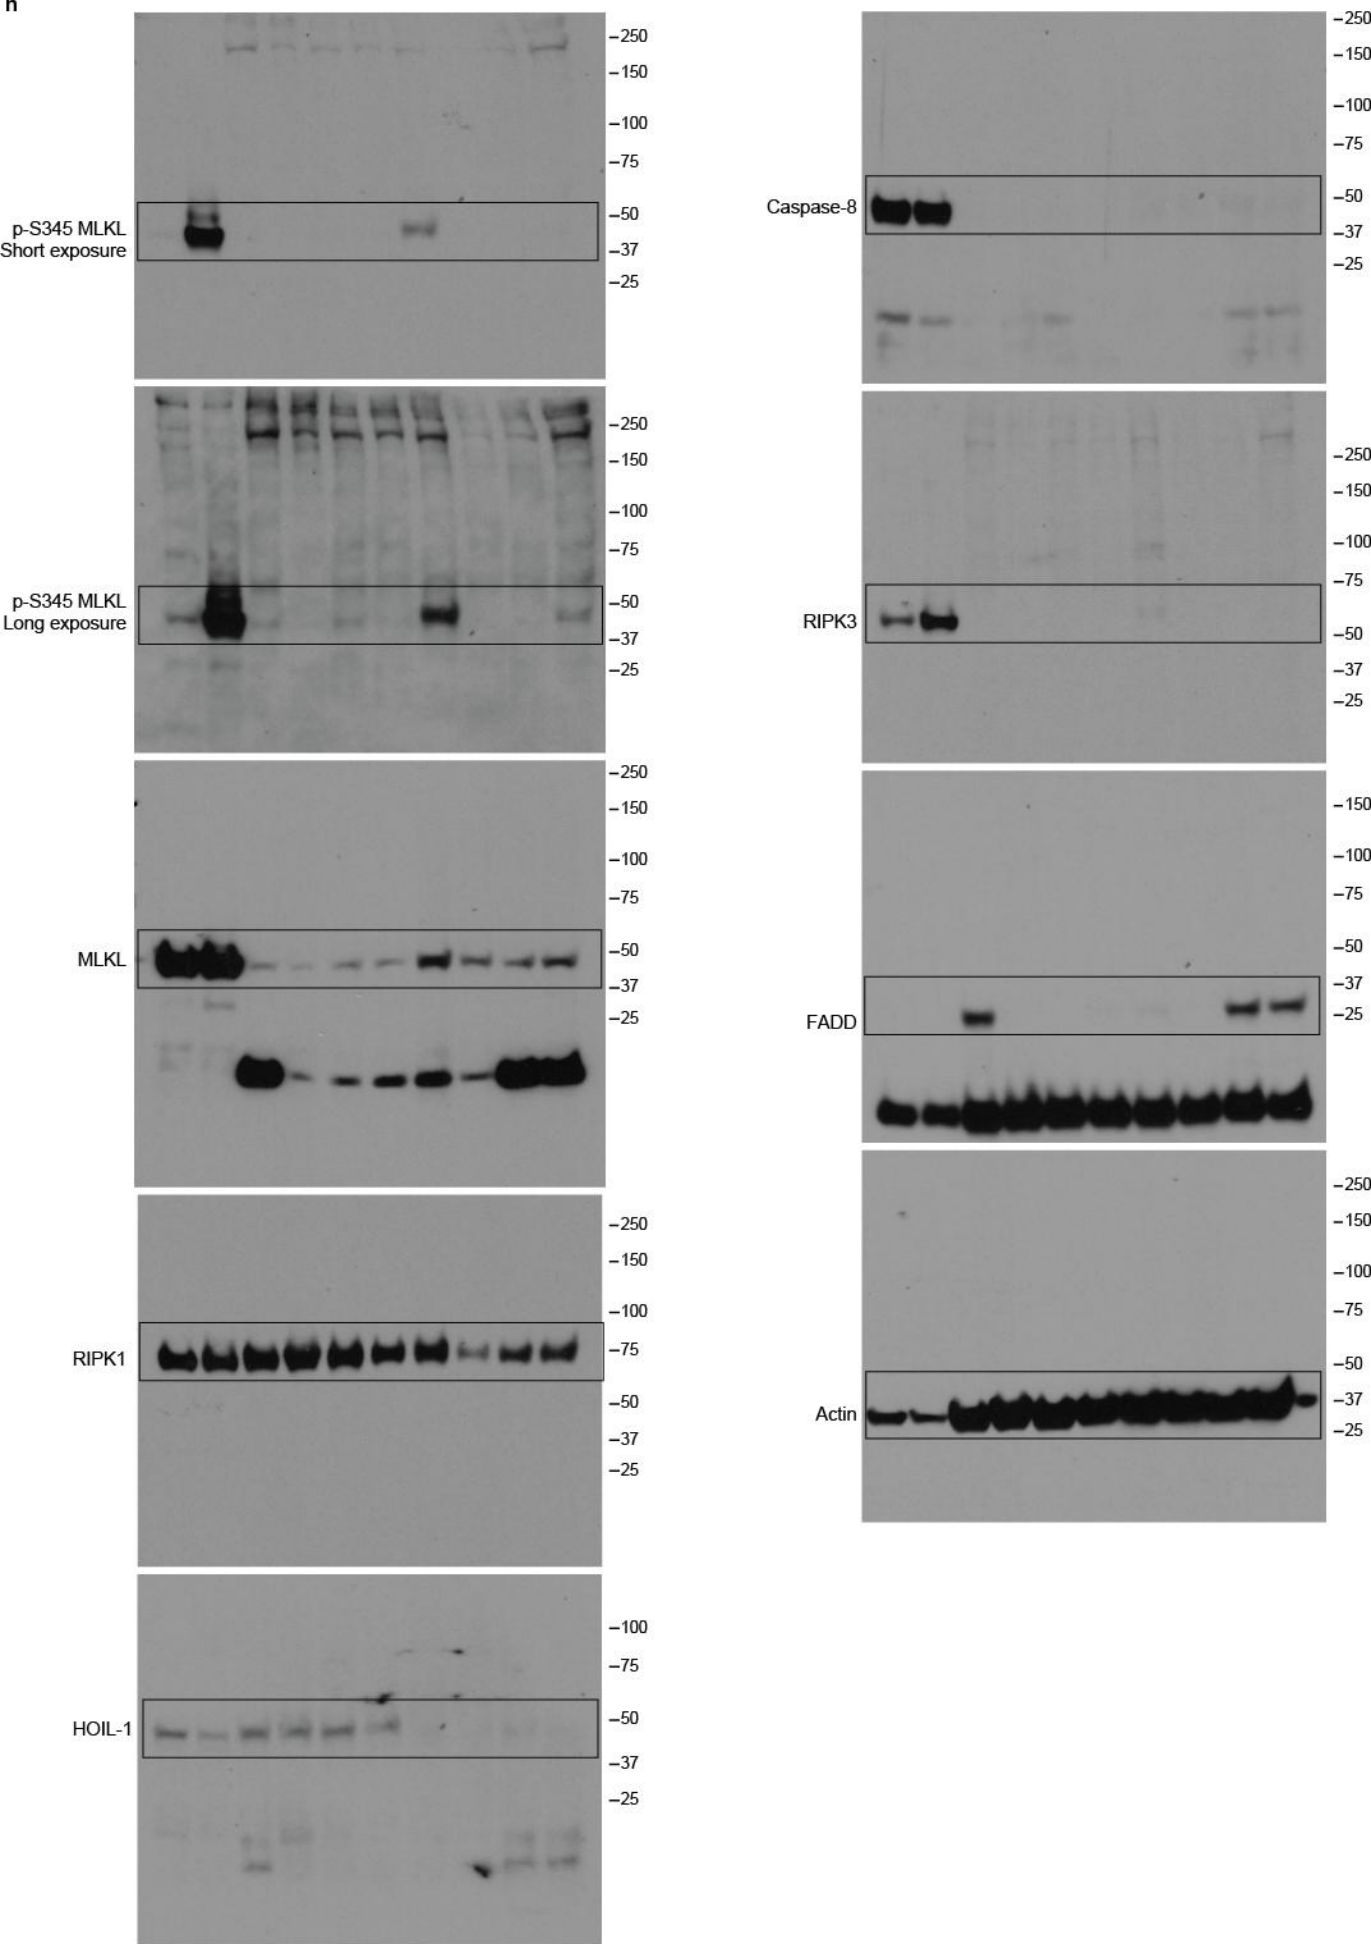



d

Cytokine array

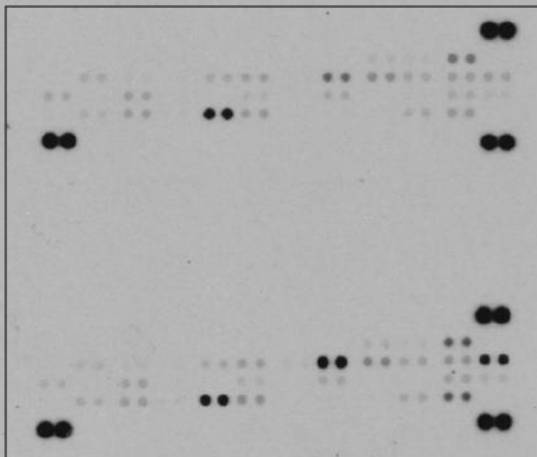

Angiogenesis array

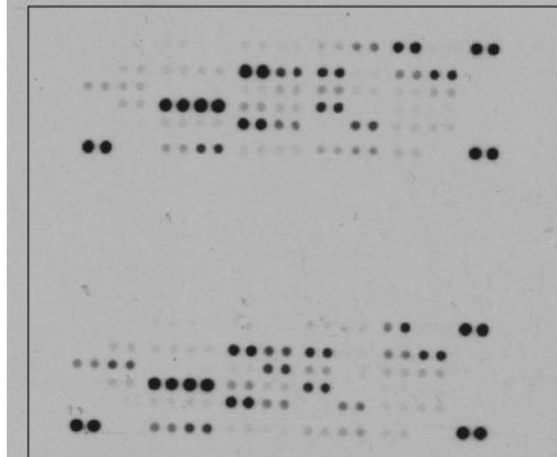

Supplement: NIHMS76730-supplement-Supplementary_figure_1.pdf [file NIHMS76730-supplement-Supplementary_figure_1.pdf]
